# Supplementary material for: Efficient relaxivity enhancement in dendritic gadolinium complexes: effective motional coupling in medium molecular weight conjugates
Source: Royal Society of Chemistry journal article supplement (doi:10.1039/b413536a), 2004-12-17

## Experimental Procedures for [G-2]- and [G-3]-Dendrimers and Complexes

### General Procedures

CH<sub>2</sub>Cl<sub>2</sub> distilled from CaH<sub>2</sub>. THF distilled from Na/benzophenone. NEt<sub>3</sub> distilled from CaH<sub>2</sub>. Gel filtration chromatography was performed with Biogel P-6 gel fine (column 2.5 cm x 98 cm) eluting with water at 0.7 mL min<sup>-1</sup>. Detection was performed with a Knauer Differential Refractometer.

[G-2]-ol and [G-3]-ol prepared according to (a) Jayaraman, M.; Fréchet, J. M. J. *J. Am. Chem. Soc.* **1998**, *120*, 12996-12997. (b) Grayson, S. M.; Fréchet, J. M. J. *J. Am. Chem. Soc.* **2000**, *122*, 10335-10344.

### [G-2]-azide

To a stirred solution of [G-2]-ol (2.154 g, 3.50 mmol) and Et<sub>3</sub>N (1.22 mL, 8.75 mmol) in CH<sub>2</sub>Cl<sub>2</sub> at 0 °C under an Ar atmosphere was added dropwise methanesulfonylchloride (0.60 mL, 7.74 mmol). The reaction mixture was stirred at 0 °C for 1 h, then H<sub>2</sub>O was added (20 mL) and the mixture stirred vigorously for 10 min. The mixture was transferred to a separatory funnel and CH<sub>2</sub>Cl<sub>2</sub> was then added (100 mL). The organic layer was then washed with 1 M HCl (100 mL), saturated NaHCO<sub>3</sub> solution (100 mL) and H<sub>2</sub>O (100 mL). The organic layer was dried (MgSO<sub>4</sub>), filtered and evaporated to dryness to afford the crude mesylate (2.48 g), which was used immediately. <sup>1</sup>H NMR (300 MHz, CDCl<sub>3</sub>): δ = 2.23 – 2.27 (1H, m), 2.79 (3H, s), 3.47 – 3.68 (14H, m), 4.31 (2H, d, *J* = 5.5 Hz), 4.48 (8H, s), 7.24 – 7.35 (20H, m). <sup>13</sup>C NMR (75 MHz, CDCl<sub>3</sub>): δ = 36.7, 40.4, 67.7, 68.7, 70.35, 70.37, 73.6, 78.8, 127.9, 128.6, 138.4.

A suspension of crude mesylate and NaN<sub>3</sub> in DMF (20 mL) was stirred at 60 °C under an Ar atmosphere for 14 h. The solvent was then removed and the residue partitioned between H<sub>2</sub>O (100 mL) and CH<sub>2</sub>Cl<sub>2</sub> (100 mL). The aqueous phase was further extracted with CH<sub>2</sub>Cl<sub>2</sub> (2 x 100 mL), and the organics combined, dried (MgSO<sub>4</sub>), filtered and evaporated to dryness. The product was purified by column chromatography (SiO<sub>2</sub>: EtOAc/Hexanes 15:85) to afford the [G-2]-azide as a clear oil (1.89 g, 84%). <sup>1</sup>H NMR (300 MHz, CDCl<sub>3</sub>): δ = 2.10 -2.18 (1H, m), 3.46 (2H, d, *J* = 6.0 Hz), 3.53 – 3.68 (14H, m), 4.53 (8H, s), 7.26 – 7.37 (20H, m). <sup>13</sup>C NMR (75 MHz, CDCl<sub>3</sub>): δ = 40.7, 50.4, 68.8, 70.3, 73.6, 78.7, 127.82, 127.84, 128.6, 138.5. ES MS [M]<sup>+</sup> (calcd 662.3206) found 662.3237.

### [G-2]-amine, 2

A suspension of [G-2]-azide (1.89 g), 10% Pd(OH)<sub>2</sub>/C and N<sub>2</sub>H<sub>4</sub>·H<sub>2</sub>O in THF/EtOH was stirred at 90 °C and the progress of the reaction monitored by ES<sup>+</sup>. Further 10% Pd(OH)<sub>2</sub>/C and N<sub>2</sub>H<sub>4</sub>·H<sub>2</sub>O were added as required. Upon completion, the reaction was filtered through a celite pad and the filtrate evaporated to dryness to afford the crude [G-2]-amine as a slightly yellow oil (767 mg, 100%). The [G-2]-amine was further purified by gel filtration chromatography. <sup>1</sup>H NMR (300 MHz, D<sub>2</sub>O): δ = 2.08 – 2.16 (1H, m), 2.94 (2H, d, *J* = 6.0 Hz), 3.37 – 3.64 (14H, m). <sup>13</sup>C NMR (75 MHz, D<sub>2</sub>O): δ = 38.3, 40.8, 60.6, 69.3, 81.1. ES MS [M + H]<sup>+</sup> (calcd 254.1604) found 254.1597.

### **[G-3]-azide**

A solution of [G-2]-ol (2.677 g, 2.06 mmol) and  $\text{NEt}_3$  in  $\text{CH}_2\text{Cl}_2$  (80 mL) was cooled to 0 °C, and methanesulfonyl chloride added dropwise. The reaction mixture was stirred at 0 °C for 45 min, then  $\text{H}_2\text{O}$  was added (20 mL) and the mixture stirred vigorously for 10 min. The mixture was transferred to a separatory funnel and  $\text{CH}_2\text{Cl}_2$  was then added (100 mL). The organic layer was then washed with 1 M HCl (50 mL), saturated  $\text{NaHCO}_3$  solution (50 mL) and  $\text{H}_2\text{O}$  (50 mL). The organic layer was dried ( $\text{MgSO}_4$ ), filtered and evaporated to dryness to afford the crude mesylate (2.934 g), which was used immediately without further purification.  $^1\text{H}$  NMR (300 MHz,  $\text{CDCl}_3$ ):  $\delta$  = 2.12-2.22 (3H, m), 3.31-3.64 (36H, m), 4.21 (2H, d,  $J$  = 5.0 Hz), 4.51 (16H, s), 7.26-7.35 (40H, m).  $^{13}\text{C}$  NMR (75 MHz,  $\text{CDCl}_3$ ):  $\delta$  = 36.9, 39.8, 41.1, 68.5, 68.8, 69.7, 70.3, 73.5, 78.6, 127.7, 127.8, 128.58, 128.65, 138.6.

A suspension of crude mesylate and  $\text{NaN}_3$  (1.34 g, 20.6 mmol) in DMF (10 mL) was stirred at 60 °C under an argon atmosphere for 14 h. The solvent was then removed and the residue partitioned between  $\text{H}_2\text{O}$  (100 mL) and  $\text{CH}_2\text{Cl}_2$  (100 mL). The aqueous phase was further extracted with  $\text{CH}_2\text{Cl}_2$  (2 x 100 mL), and the organics combined, dried ( $\text{MgSO}_4$ ), filtered and evaporated to dryness. The product was purified by column chromatography ( $\text{SiO}_2$ : EtOAc/Hexanes 20:80) to afford desired azide as a clear oil (2.14 g, 78%).  $^1\text{H}$  NMR (300 MHz,  $\text{CDCl}_3$ ):  $\delta$  = 2.01-2.06 (1H, m), 2.13-2.17 (2H, m), 3.23-3.63 (38H, m), 4.50 (16H, s), 7.23-7.33 (40H, m).  $^{13}\text{C}$  NMR (75 MHz,  $\text{CDCl}_3$ ):  $\delta$  = 41.1, 49.4, 60.6, 68.8, 69.60, 69.61, 70.2, 73.5, 78.6, 127.75, 127.80, 128.6, 138.6. ES MS  $[\text{M} + \text{H}]^+$  (calcd 1346.9659) found 1346.9859.

### **[G-3]-amine, 4**

To a suspension of [G-3]-azide (270 mg) and 10%  $\text{Pd}(\text{OH})_2/\text{C}$  (224 mg) in THF:EtOH (20 mL) was added 1 drop 1 M HCl. The resulting mixture was shaken under a  $\text{H}_2$  atmosphere (45 psi) for 4 d, and then filtered through a celite pad. The filtrate was evaporated to dryness to afford the crude amine as a clear oil (158 mg). The [G-3]-amine was further purified by gel filtration chromatography.  $^1\text{H}$  NMR (300 MHz,  $\text{D}_2\text{O}$ ):  $\delta$  = 1.89-2.03 (2H, m), 2.06-2.08 (1H, m), 2.92 (2H, d,  $J$  = 6.0 Hz), 3.29-3.53 (36H, m).  $^{13}\text{C}$  NMR (75 MHz,  $\text{D}_2\text{O}$ ):  $\delta$  = 37.0, 39.9, 40.5, 60.7, 68.4, 69.5, 70.1, 81.0. ES MS  $[\text{M} + \text{H}]^+$  (calcd 578.3388) found 578.3394.

### **[G-2]-Dendrimer, 6b**

To a solution of GdgDOTA (20 mg) and HOBt (41 mg) in 1:1  $\text{H}_2\text{O}$ /Dioxane (1.0 mL) was added EDC (60 mg) and the reaction allowed to stir for 15 min. A solution of [G-2]-amine (70 mg) in  $\text{H}_2\text{O}$  (260  $\mu\text{L}$ ) was added to the reaction, and the mixture allowed to stir at room temperature for 4 d, during which time further EDC (60 mg) was added to the reaction. The reaction was then freeze-dried, the residue suspended in  $\text{H}_2\text{O}$  (0.5 mL) and centrifuged (1500 rev/min) for 5 min. The liquid was carefully removed and freeze-dried to afford the crude dendrimer as a pale brown oil (239 mg). Purification by gel-filtration chromatography afforded the pure [G-2]-dendrimer (20 mg, 48%). MALDI-TOF MS  $[\text{M} + \text{H}]^+ = 1788.7$

**[G-3]-Dendrimer, 6d**

To a suspension of Gd<sup>3+</sup>DOTA (23 mg) in DMF (0.5 mL) was added *O*-benzotriazol-1-yl-*N, N, N', N'*-tetramethyluronium tetrafluoroborate (51 mg) and the mixture allowed to stir for 2 h. A solution of [G-3]-amine (91 mg) in DMF (0.5 mL) was added to the reaction, and the mixture allowed to stir at room temperature for 5 d, during which time further *O*-benzotriazol-1-yl-*N, N, N', N'*-tetramethyluronium tetrafluoroborate (47 mg) was added to the reaction. The reaction was then filtered through a syringe filter and evaporated to dryness. Purification by gel-filtration chromatography afforded the [G-3]-dendrimer (25 mg, 30%) i.e. the fully substituted tetraamide (major product) and the under-substituted triamide (10%, minor product). MALDI-TOF MS  $[M + H]^+ = 3083.5$  (tetraamide product).

6a

*NMRD* (25°C)

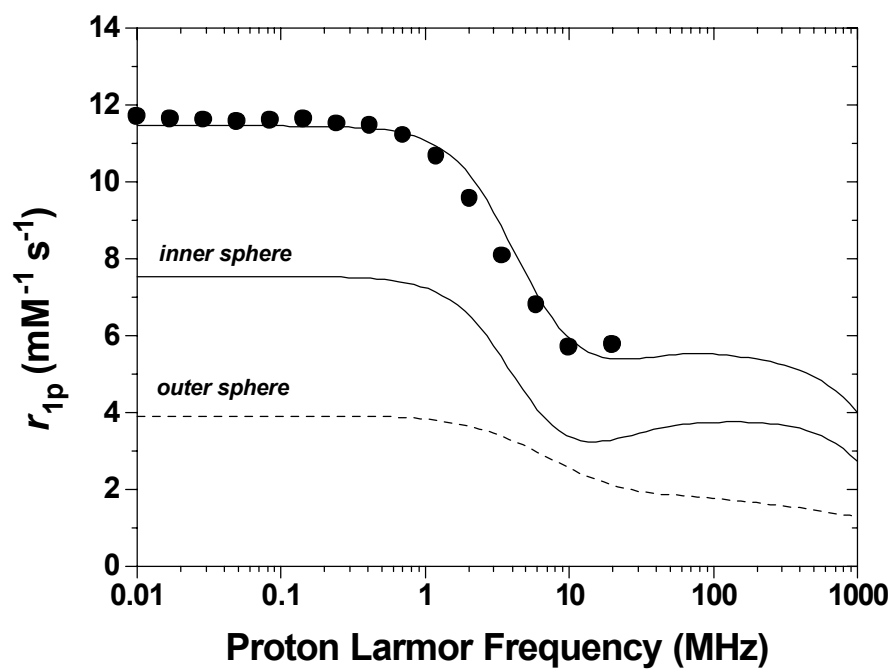

$$\Delta^2 = 5.6 \times 10^{19}$$

$$\tau_V = 10 \text{ ps}$$

$$\tau_R = 100 \text{ ps}$$

$$r = 3.0 \text{ \AA}$$

$$q = 1$$

$$a = 4.0 \text{ \AA}$$

$$D = 2.24 \times 10^{-5} \text{ cm}^2 \text{ s}^{-1}$$

*VT  $^{17}\text{O}$  NMR (17 mM, 2.1 Tesla)*

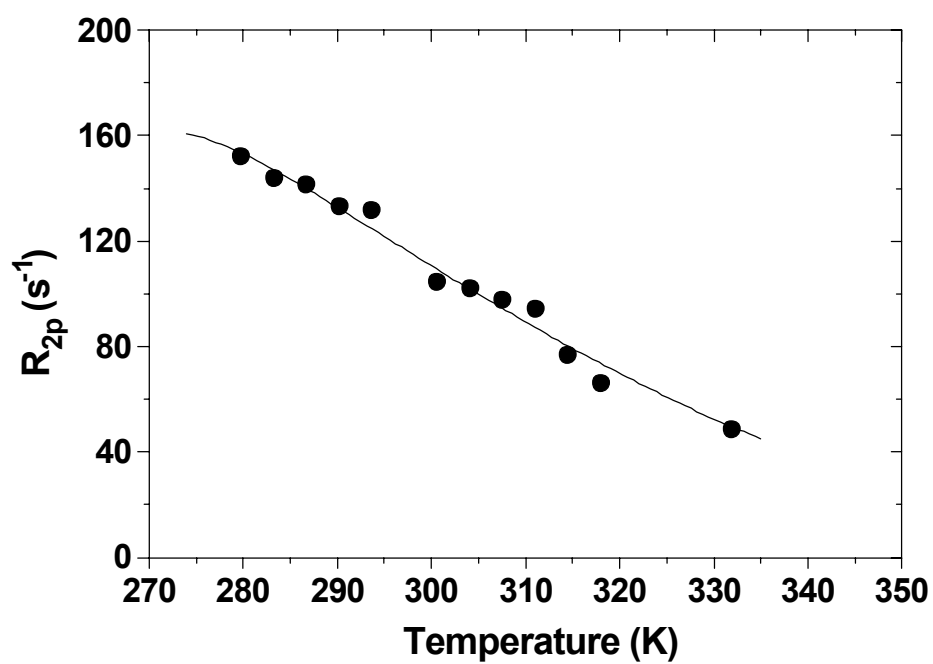

$$\Delta^2 = 5.6 \times 10^{19}$$

$$\tau_V = 10 \text{ ps}$$

$$\Delta H_V = 8.2 \text{ kJ/mol}$$

$$\tau_M = 42 \text{ ns}$$

$$\Delta H_M = 51.0 \text{ kJ/mol}$$

$$q = 1$$

$$A/\hbar = -3.8 \times 10^6 \text{ rad s}^{-1}$$

6d

*NMRD* (25°C)

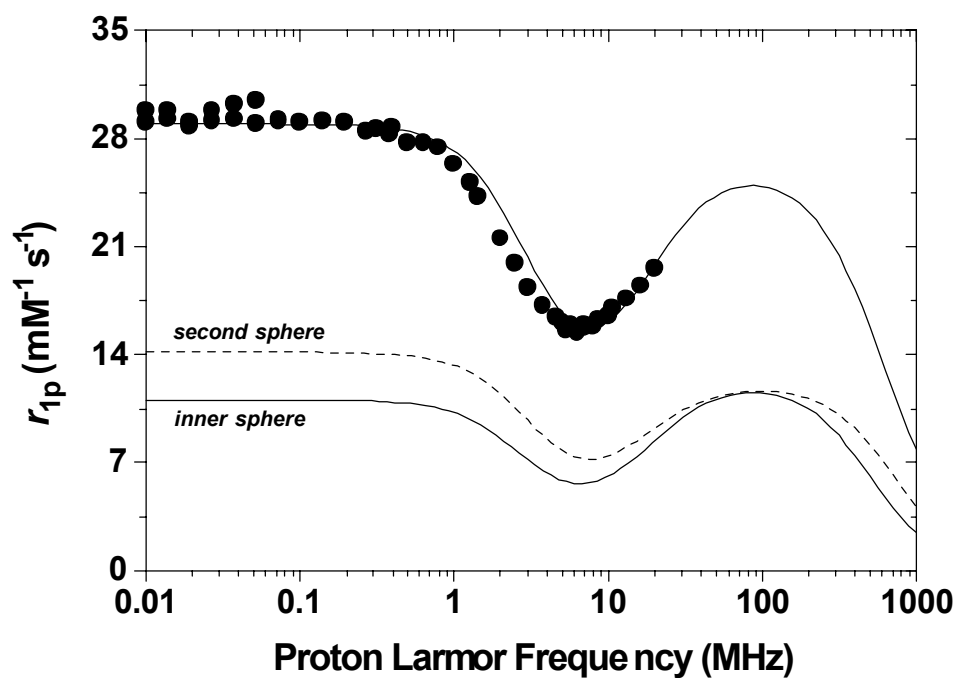

$$\Delta^2 = 4.4 \times 10^{19}$$

$$\tau_V = 15.8 \text{ ps}$$

$$\tau_R = 330 \text{ ps}$$

$$r = 3.0 \text{ \AA}$$

$$q = 1$$

$$a = 4.0 \text{ \AA}$$

$$D = 2.24 \times 10^{-5} \text{ cm}^2 \text{ s}^{-1}$$

$$q' = 8$$

$$r' = 4.0 \text{ \AA}$$

*VT  $^{17}\text{O}$  NMR (10 mM; 2.1 Tesla)*

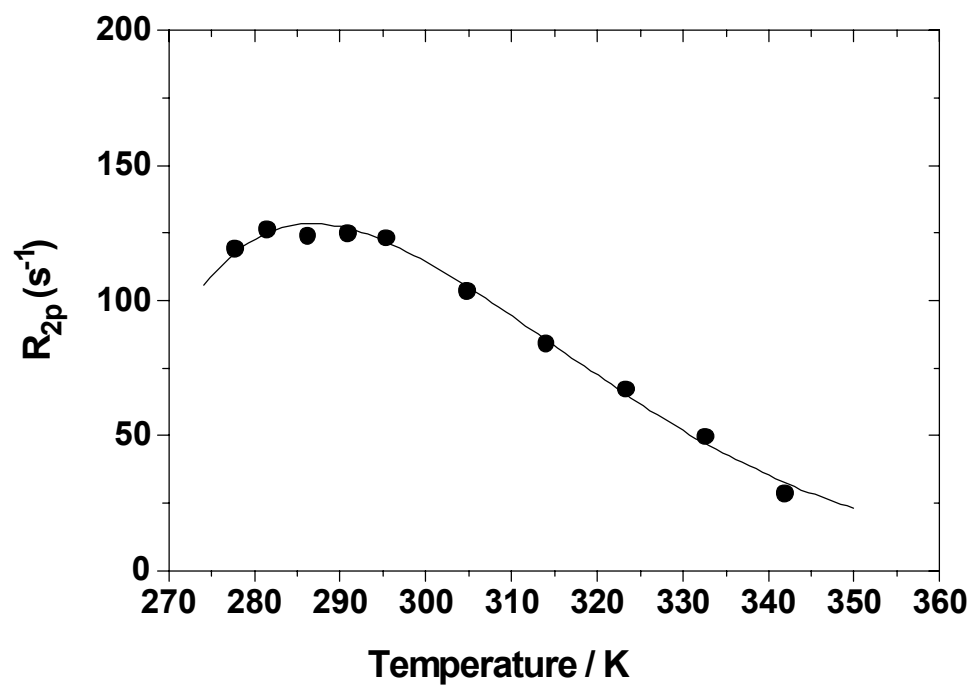

$$\Delta^2 = 4.4 \times 10^{19}$$

$$\tau_V = 16 \text{ ps}$$

$$\Delta H_V = 6.0 \text{ kJ/mol}$$

$$\tau_M = 85 \text{ ns}$$

$$\Delta H_M = 59.0 \text{ kJ/mol}$$

$$q = 1$$

$$A/\hbar = -3.8 \times 10^6 \text{ rad s}^{-1}$$

# Electrospray Mass Spectrum Of [G-2]-Dendrimer

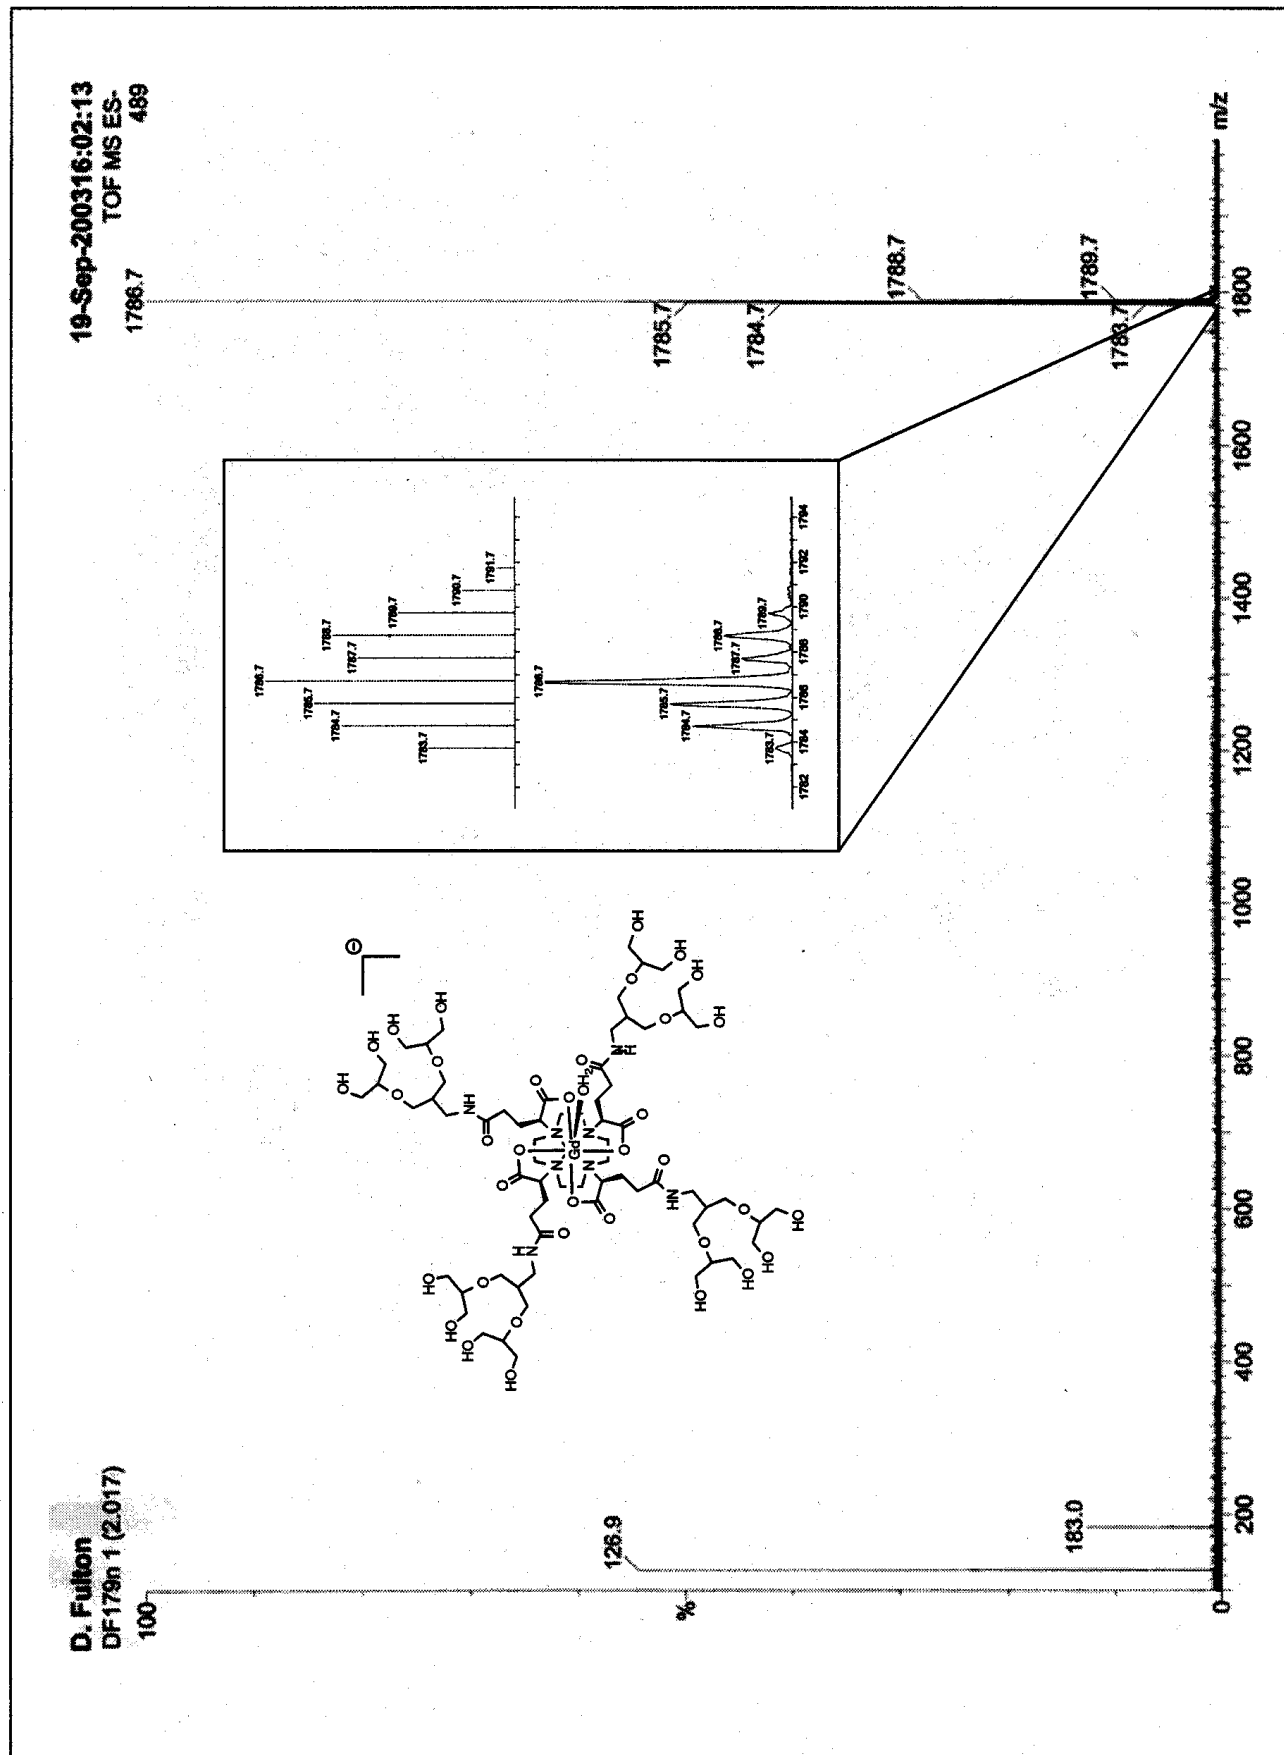



coupling reaction

KsGdgDOTADE1 23 (2.364)

20-Mar-2002  
12:06:31  
Scan ES-  
1.25e3

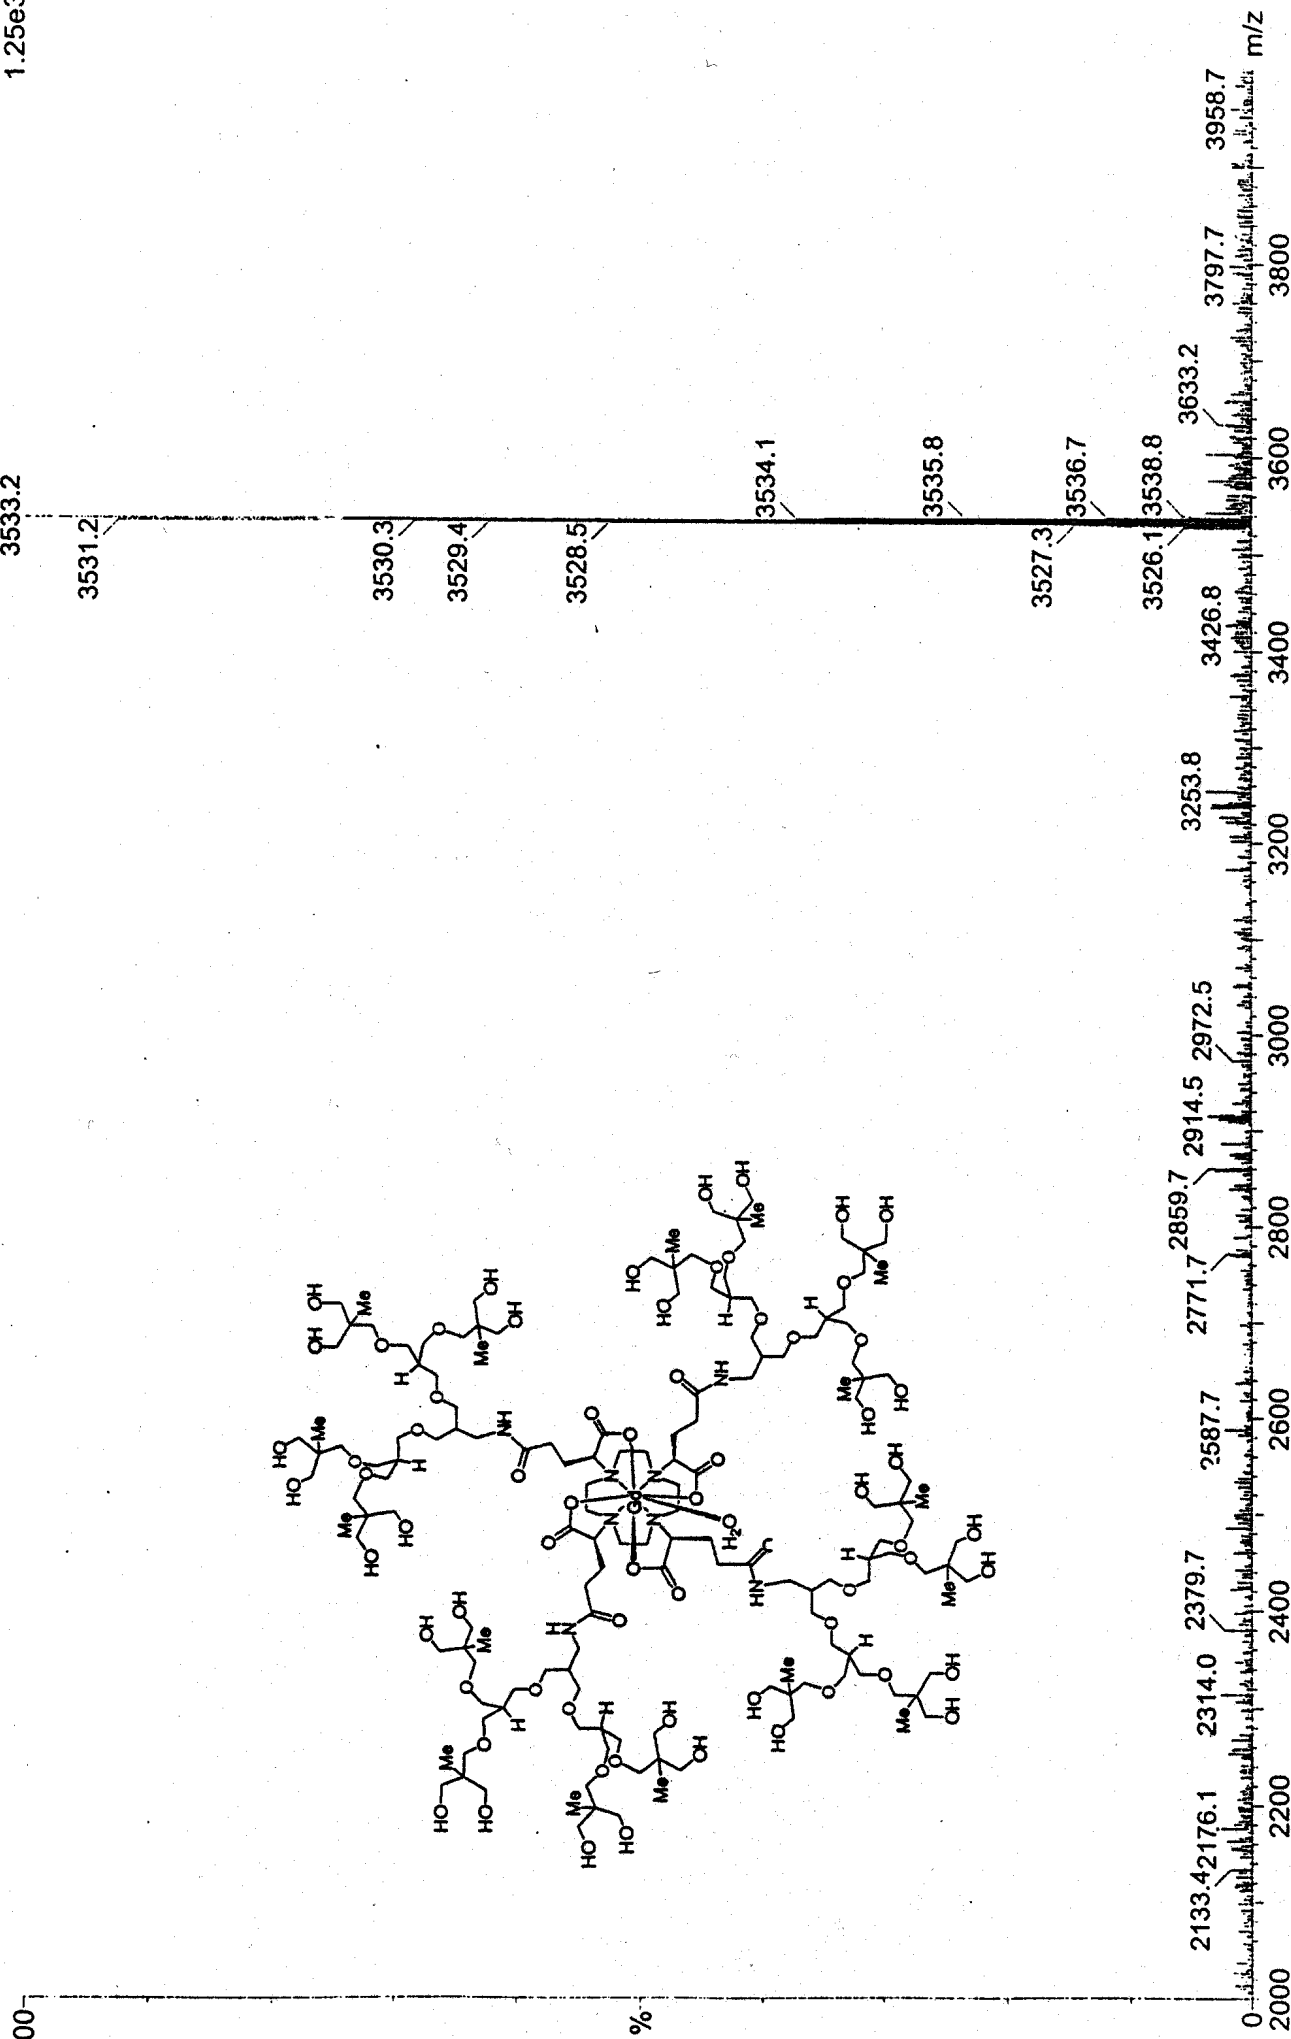

# coupling reaction

ksGdgDOTADEf11 67 (6.837)

13-Feb-2004  
10:33:07  
Scan ES-  
2.74e3

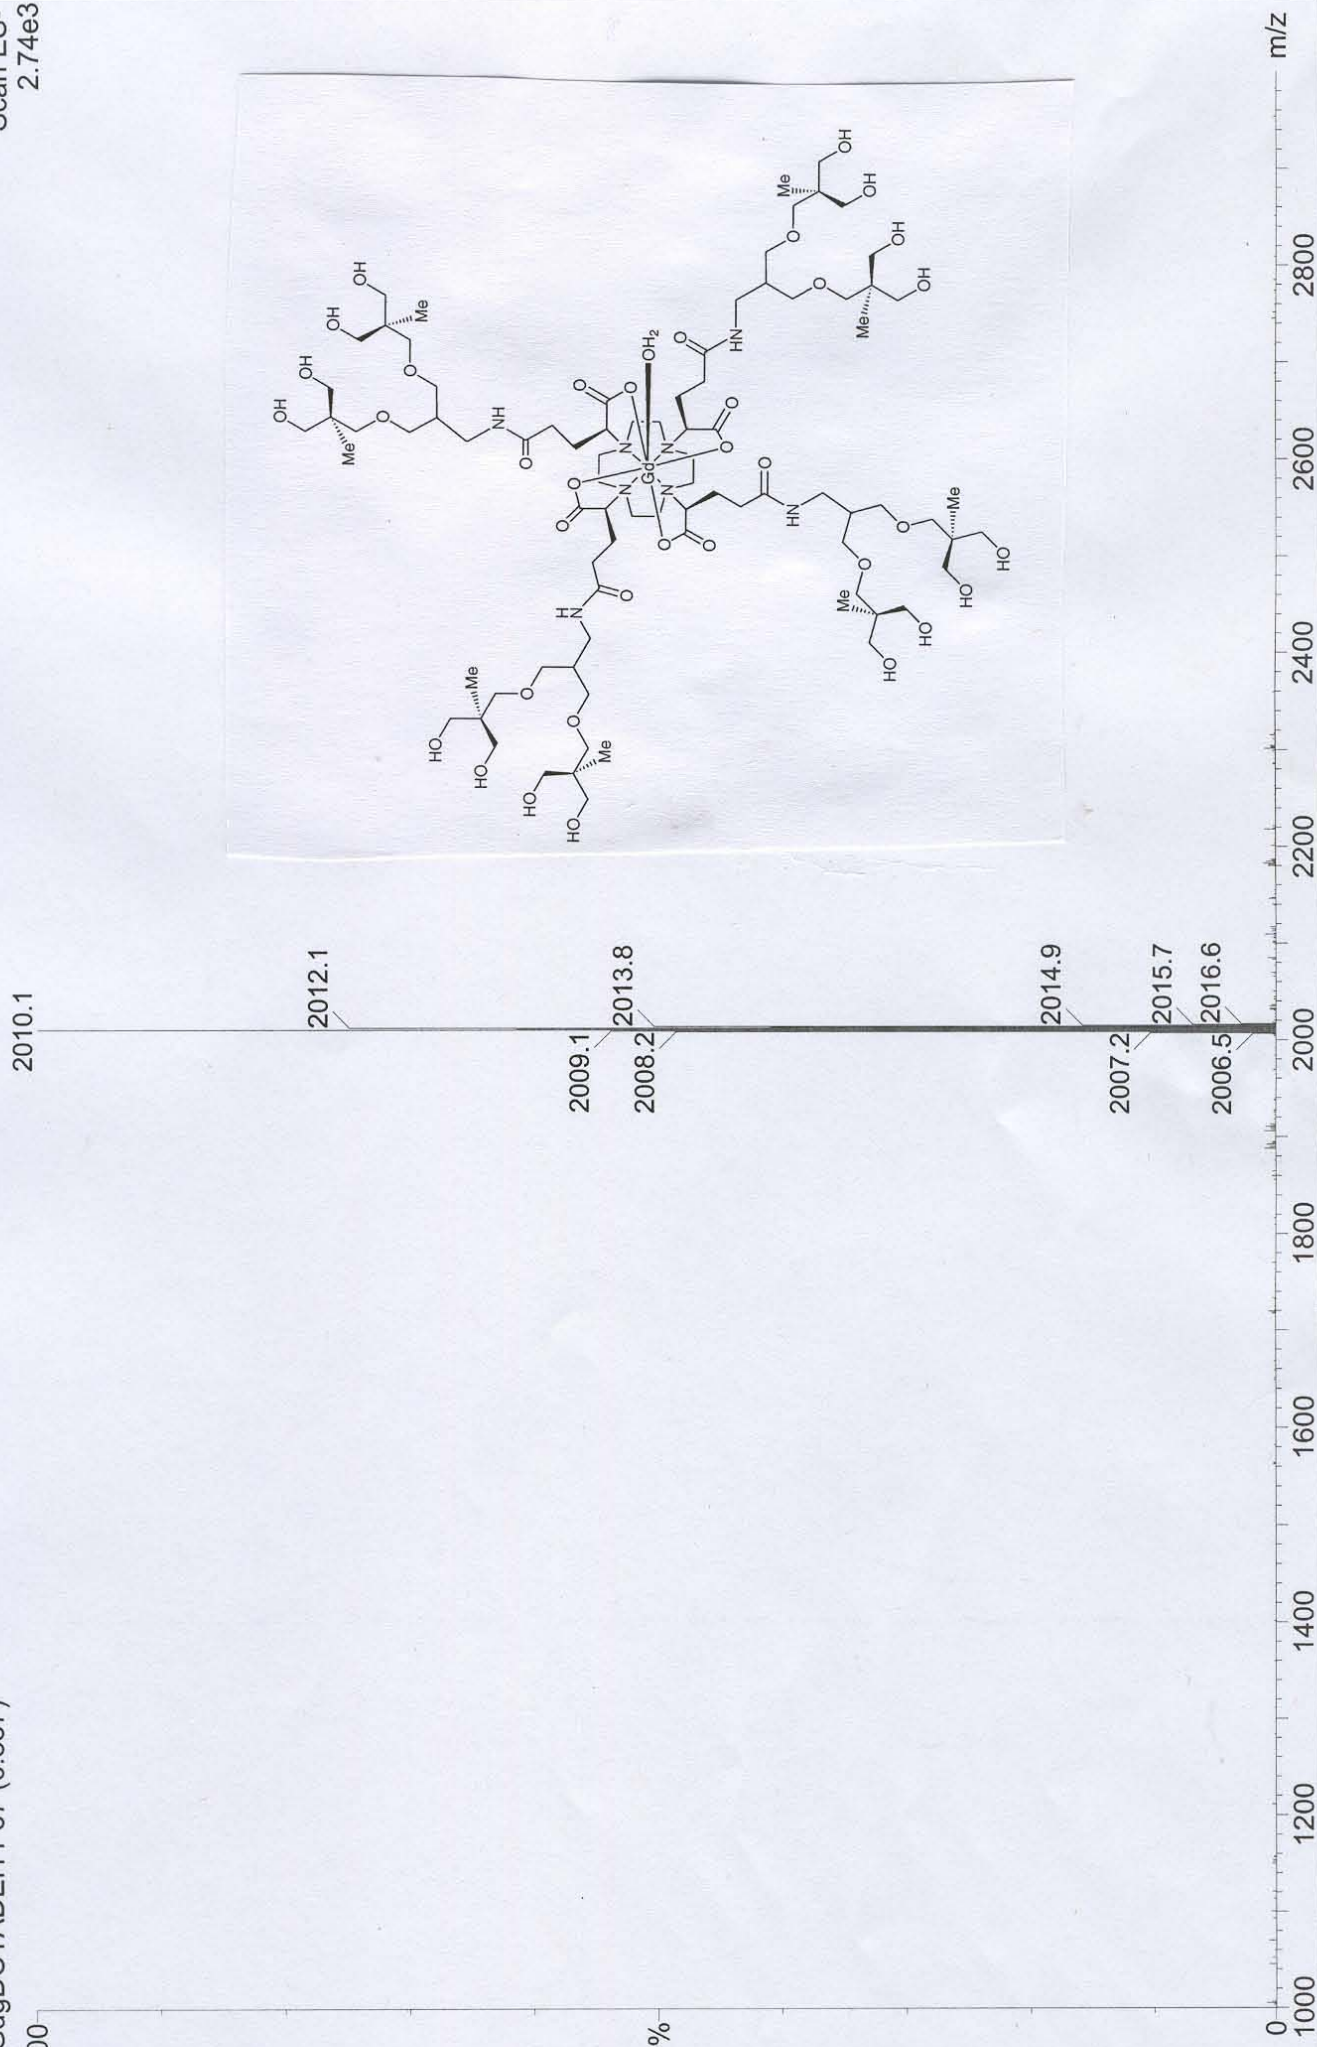

# EPSRC National MS Centre, Swansea

ISO:C124H236N8O68Gd

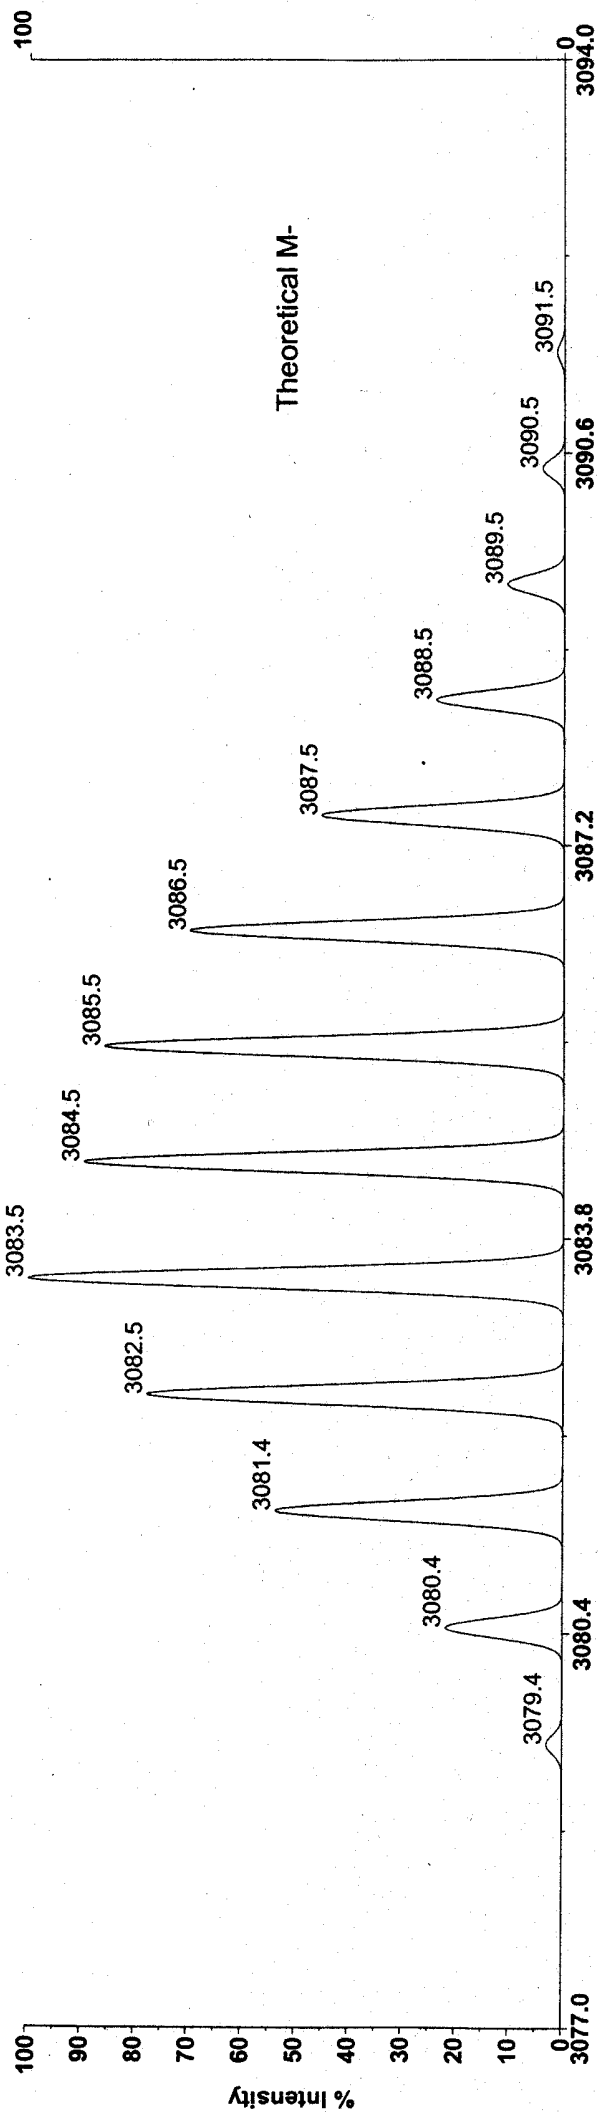

<<DUR12PAR(neg)\_0001>> Voyager Spec #1=>AdvBC(64,0.5,0.1)=>NF0.7[BP = 3083.5, 8376]

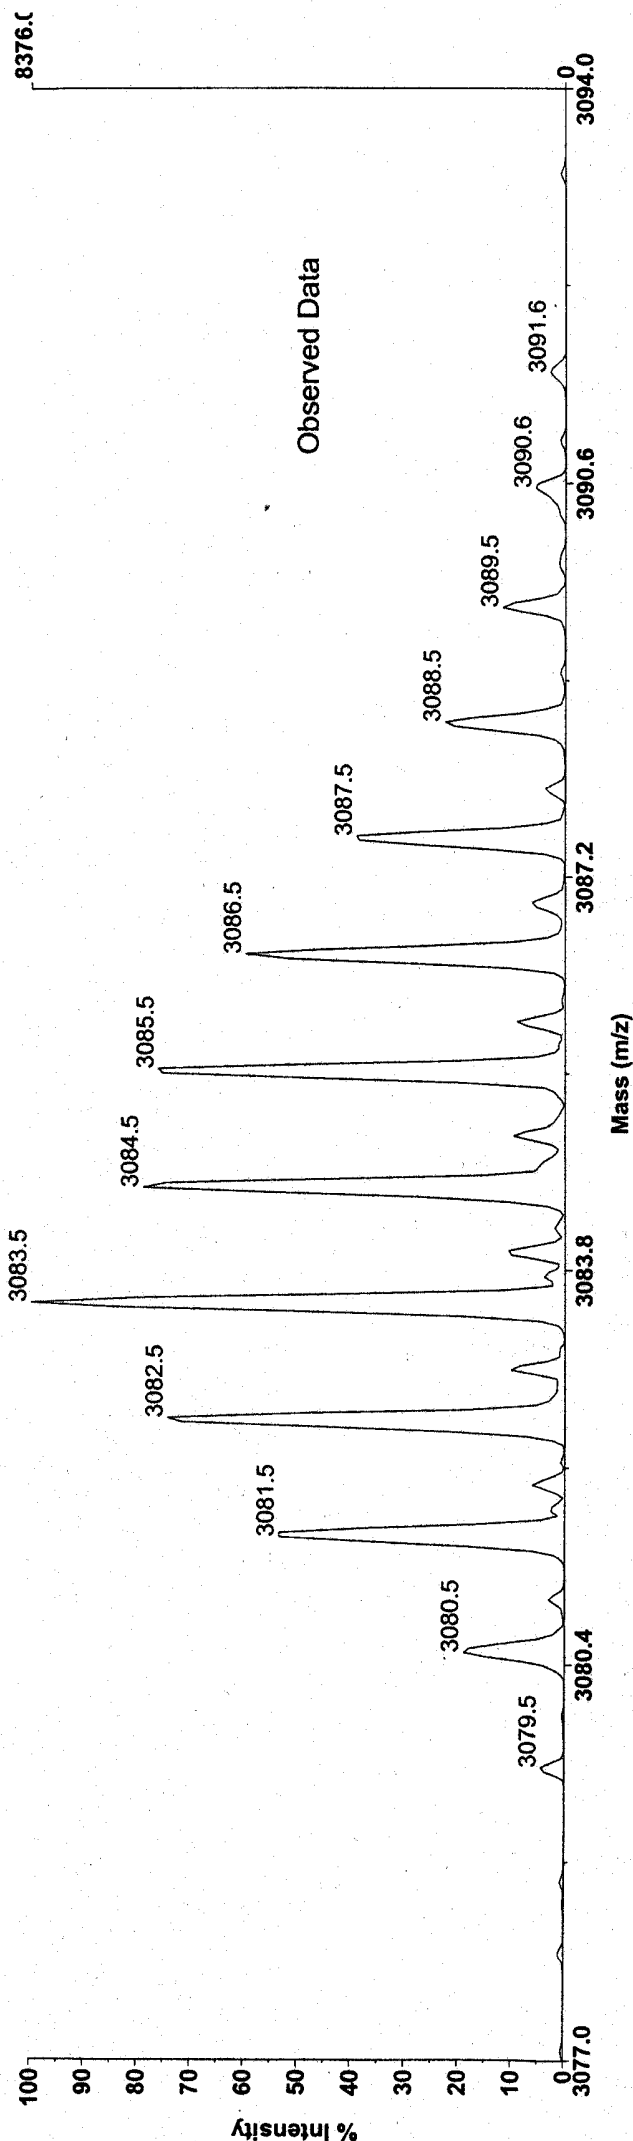

# EPSRC National MS Centre, Swansea

<<DUR12PAR(neg)\_0001>> Voyager Spec #1=>AdvBC(64,0.5,0.1)=>NF0.7[BP = 3083.5, 8376]

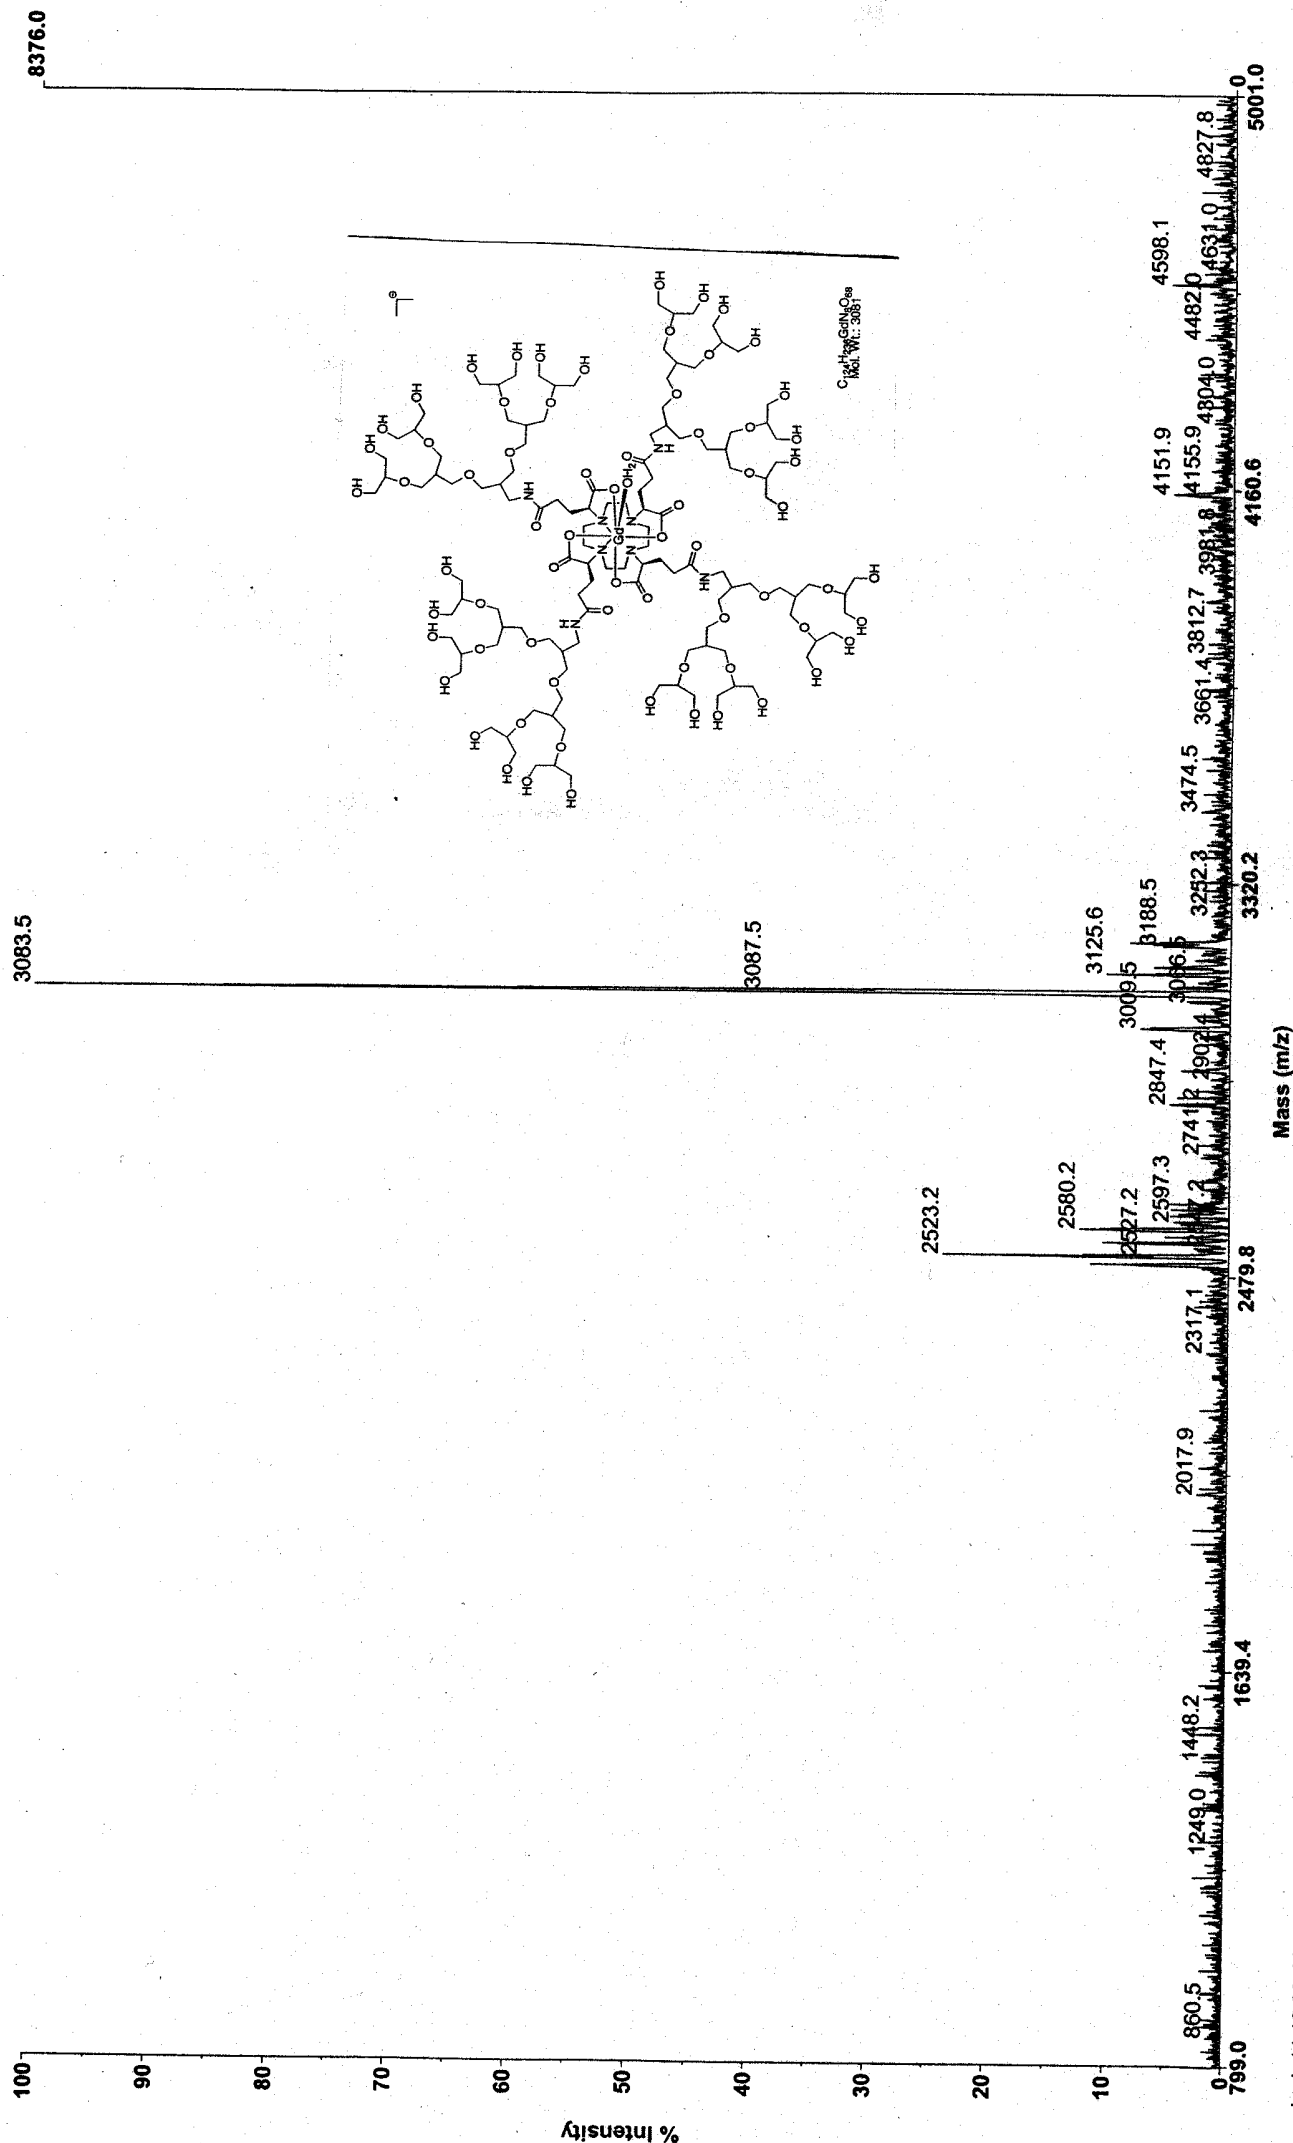

Supplement: b413536a.pdf [file b413536a.pdf]
